# Supplementary material
Source: PubMed Central journal article supplement (PMC3291198)

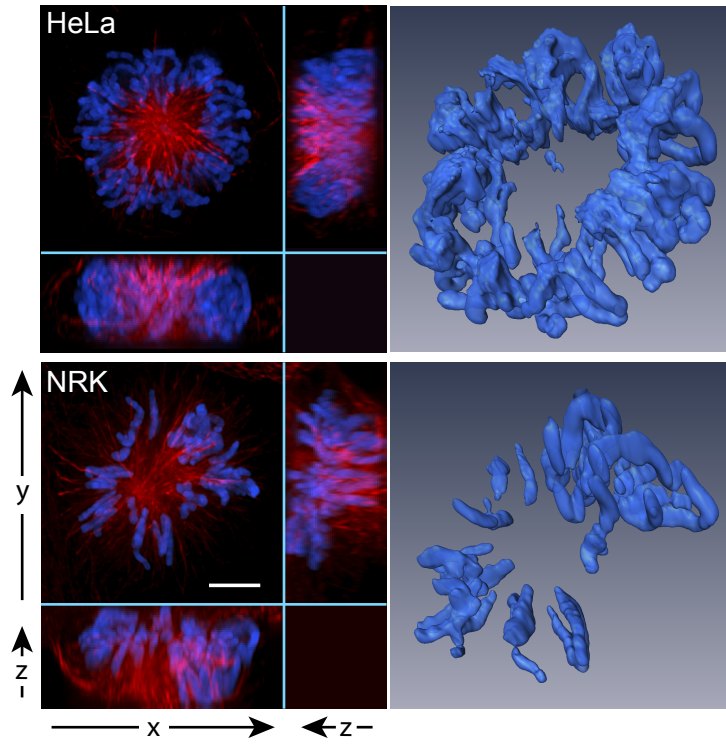

Magidson et al. Figure S1

Supplement: NIHMS358872-supplement-Figure_S1.pdf [file NIHMS358872-supplement-Figure_S1.pdf]

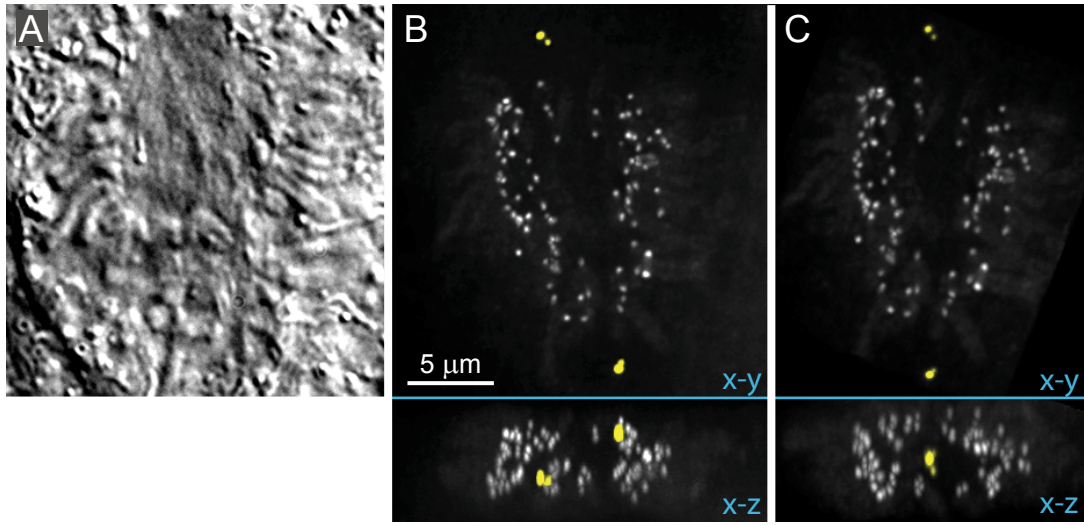

Magidson et al. Figure S2

Supplement: NIHMS358872-supplement-Figure_S2.pdf [file NIHMS358872-supplement-Figure_S2.pdf]

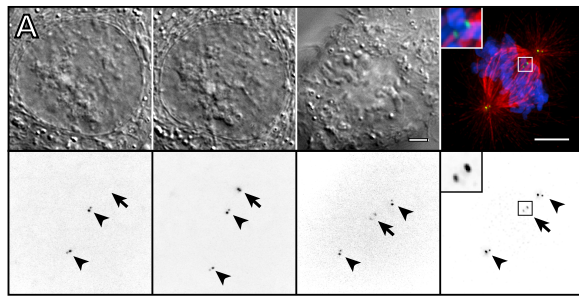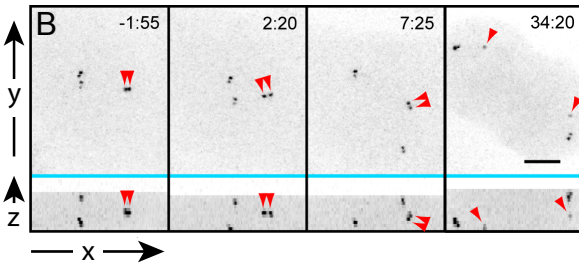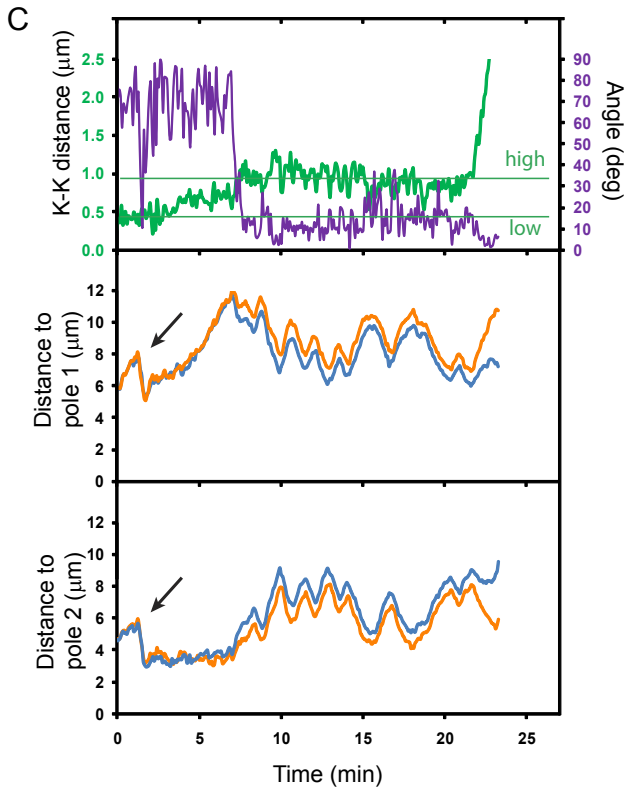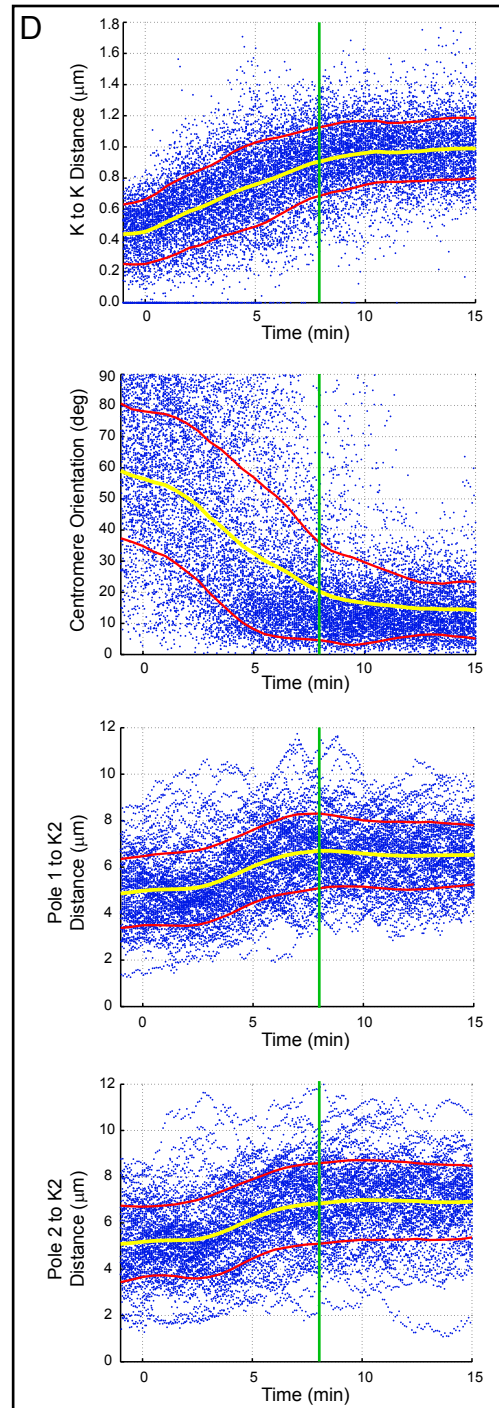

Magidson et al. Figure S3

Supplement: NIHMS358872-supplement-Figure_S3.pdf [file NIHMS358872-supplement-Figure_S3.pdf]

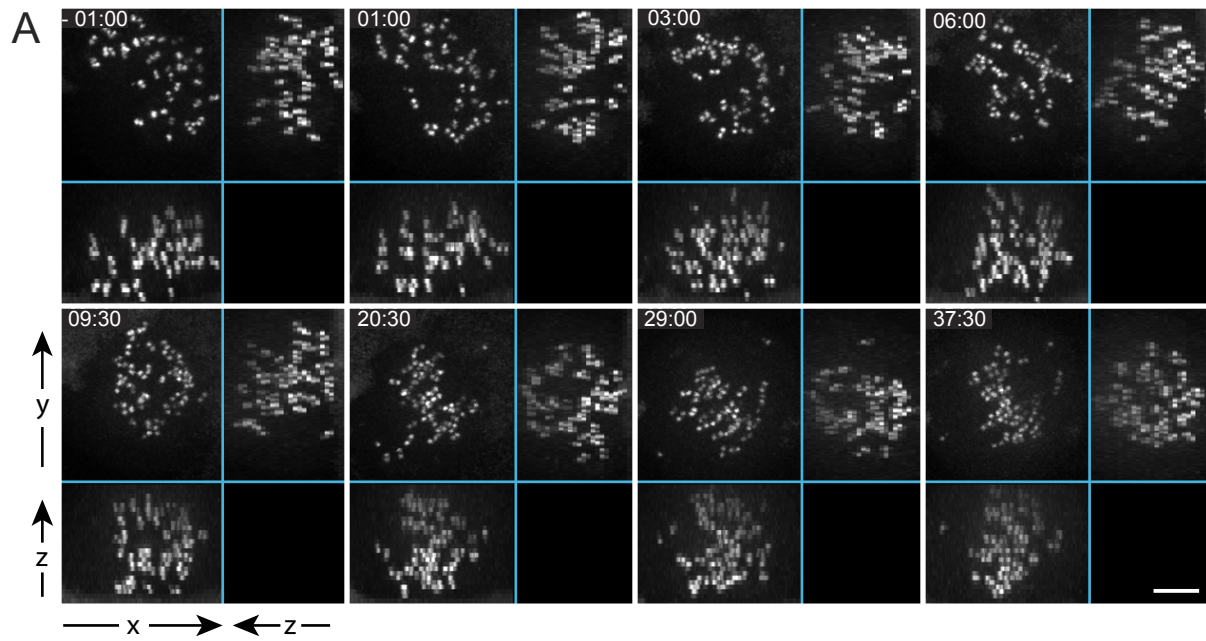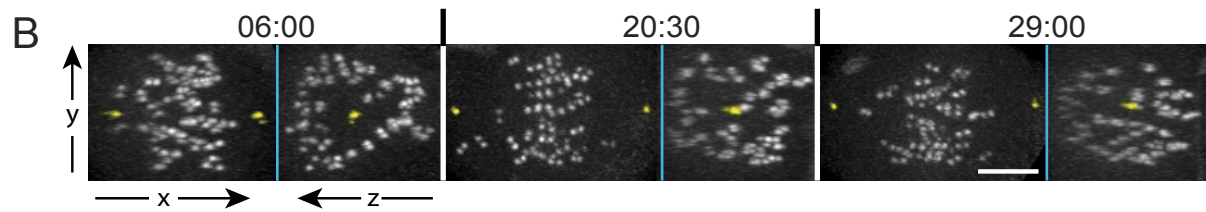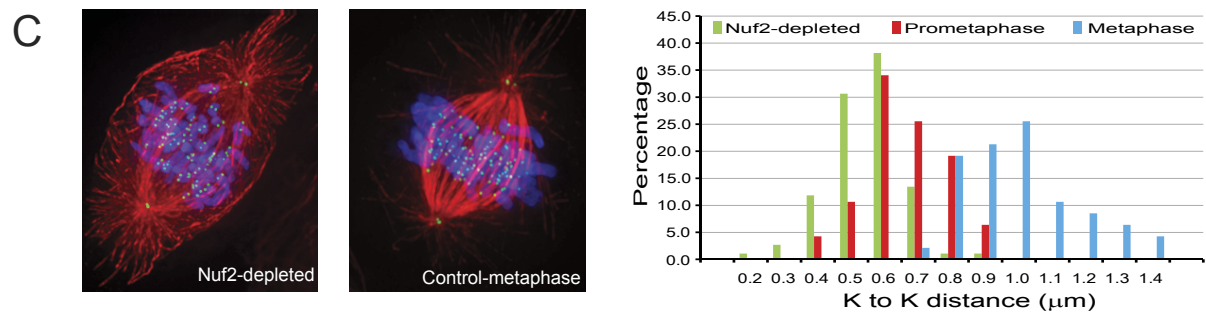

Magidson et al. Figure S4

Supplement: NIHMS358872-supplement-Figure_S4.pdf [file NIHMS358872-supplement-Figure_S4.pdf]
